# Supplementary material for: Enhancing oxygen evolution reactions in nanoporous high-entropy catalysts using boron and phosphorus additives
Source: Royal Society of Chemistry journal article supplement (doi:10.1039/d3nr06065a), 2024-01-01
Supplement: d3nr06065a1.pdf [file d3nr06065a1.pdf]

## Supporting Information

# Enhancing oxygen evolution reactions in nanoporous high-entropy catalysts using boron and phosphorus additives

*Ze-Xing Cai, Saikat Bolar, Yoshikazu Ito, Takeshi Fujita\**

Ze-Xing Cai, Saikat Bolar, Takeshi Fujita

School of Engineering Science, Kochi University of Technology, 185 Miyanokuchi,

Tosayamada, Kami City, Kochi 782-8502, Japan

E-mail: [fujita.takeshi@kochi-tech.ac.jp](mailto:fujita.takeshi@kochi-tech.ac.jp)

Yoshikazu Ito

Institute of Applied Physics, Graduate School of Pure and Applied Sciences, University of

Tsukuba, Tsukuba 305-8573, Japan.

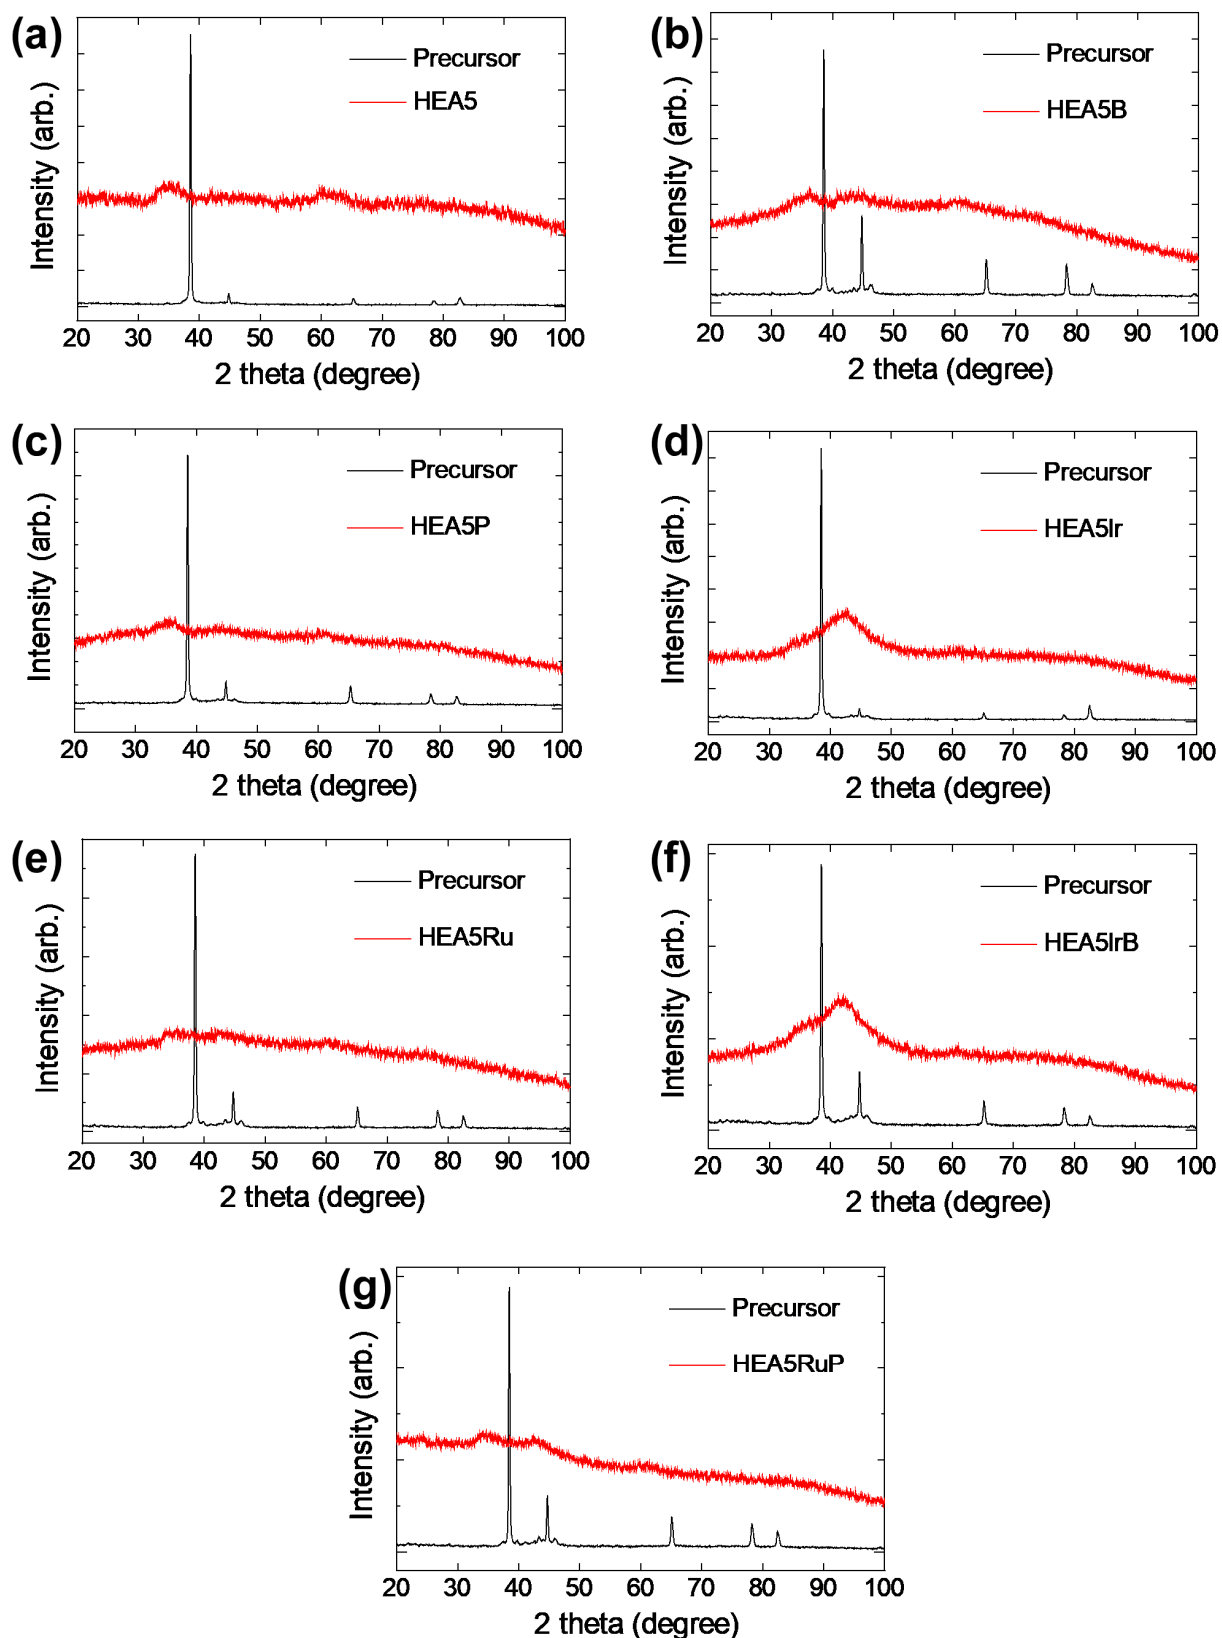

**Figure S1.** XRD patterns of the np-HEA catalysts and as-prepared precursor alloy ribbons: (a) HEA5, (b) HEA5B, (c) HEA5P, (d) HEA5Ir, (e) HEA5Ru, (f) HEA5IrB, and (g) HEA5RuP.

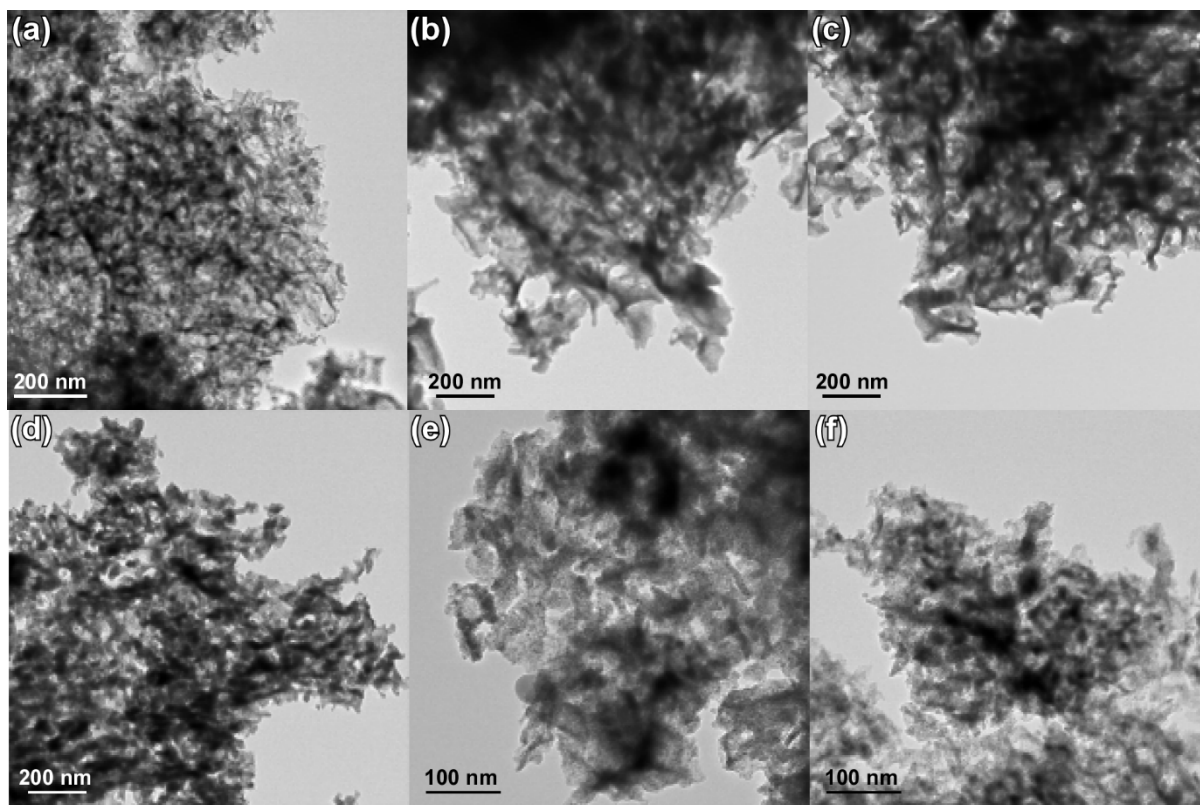

**Figure S2.** Low-magnification TEM images: (a) HEA5B, (b) HEA5P, (c) HEA5Ir, (d) HEA5IrB, (e) HEA5Ru, and (f) HEA5RuP.

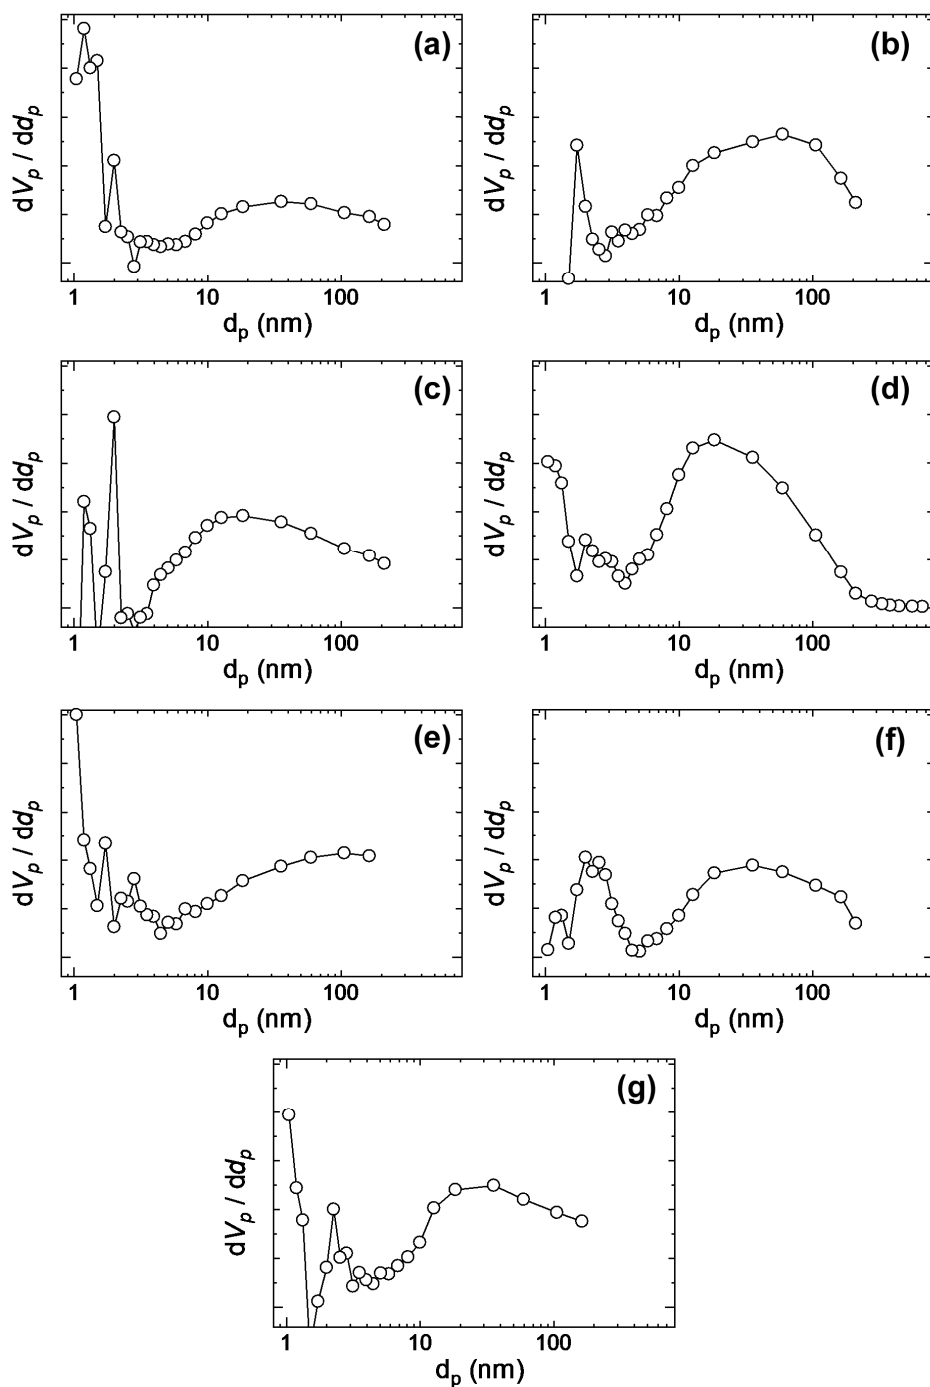

**Figure S3.** BJH pore size distributions, showing hierarchical distributions with a high population of  $\sim 2\text{--}5$  nm and a broad peak for  $\sim 30\text{--}40$  nm particles, consistent with the TEM observations. (a) HEA5, (b) HEA5B, (c) HEA5P, (d) HEA5Ir, (e) HEA5Ru, (f) HEA5IrB, (g) HEA5RuP.

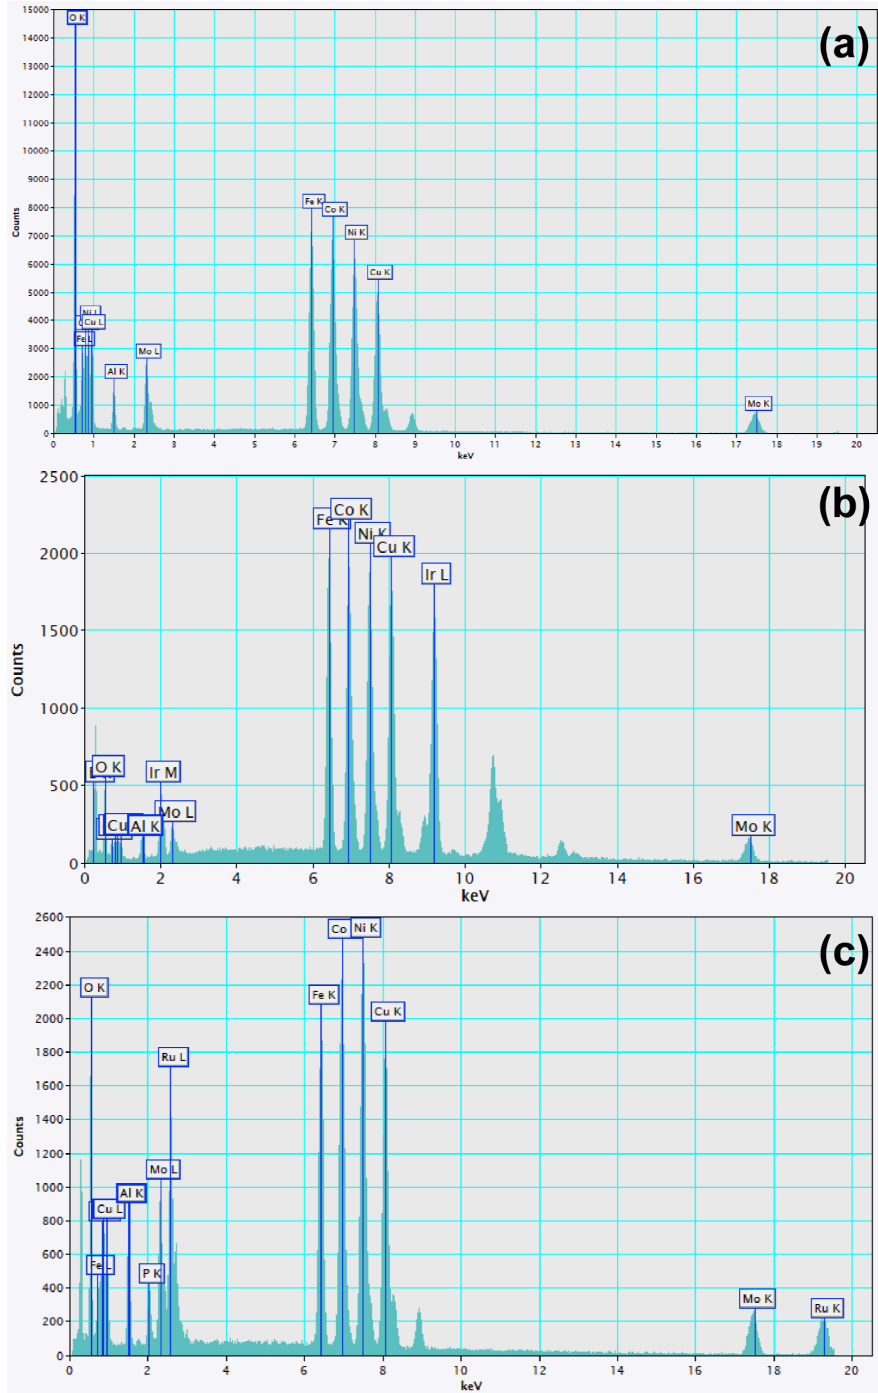

**Figure S4.** EDS analyses of (a) HEA5, (b) HEA5IrB, and (c) HEA5RuP.

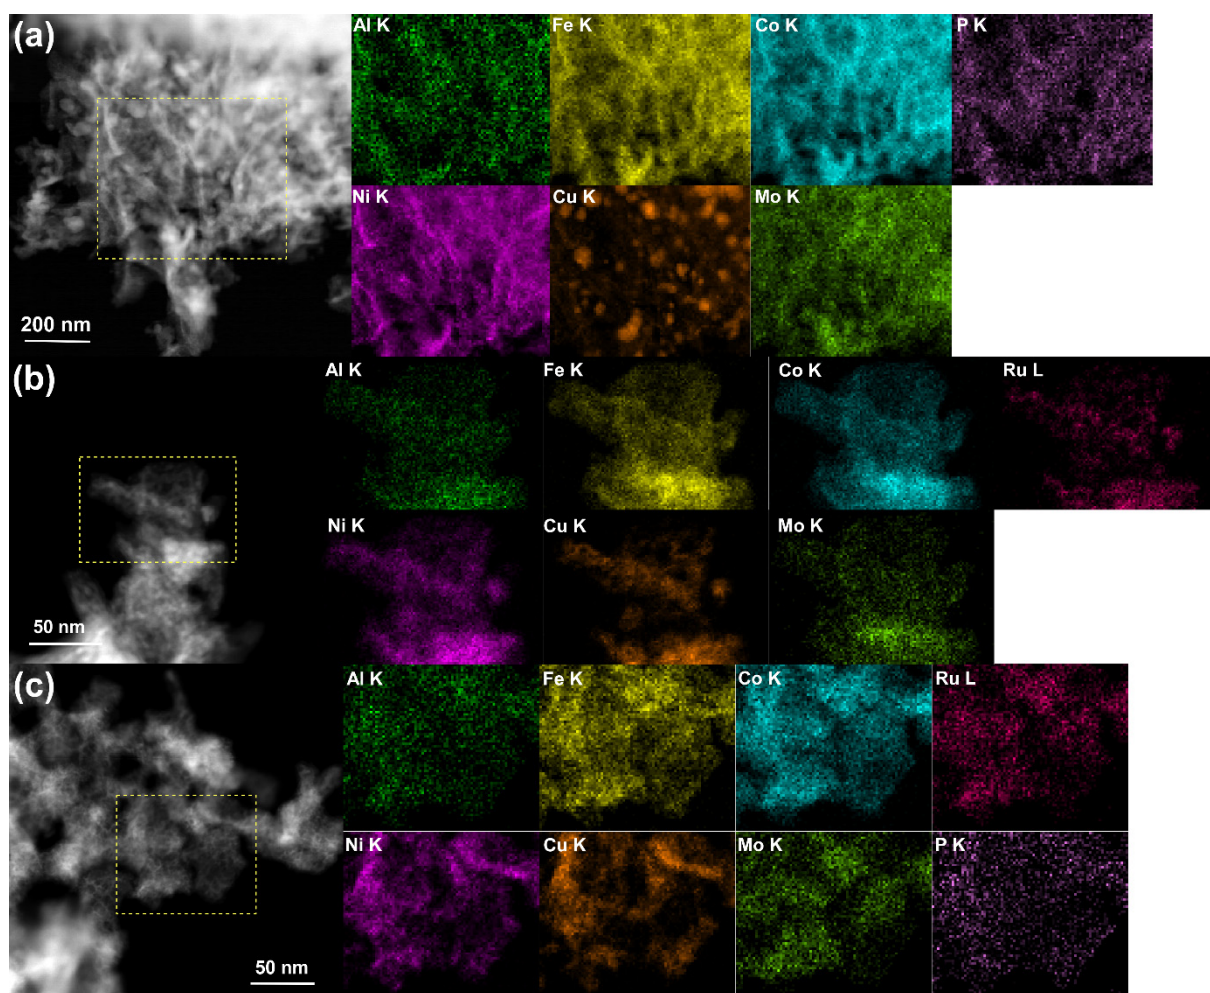

**Figure S5.** High-angle dark-field STEM images of the np-HEAs and corresponding EDS maps for each characteristic peak: (a) HEA5P, (b) HEA5Ru, and (c) HEA5RuP.

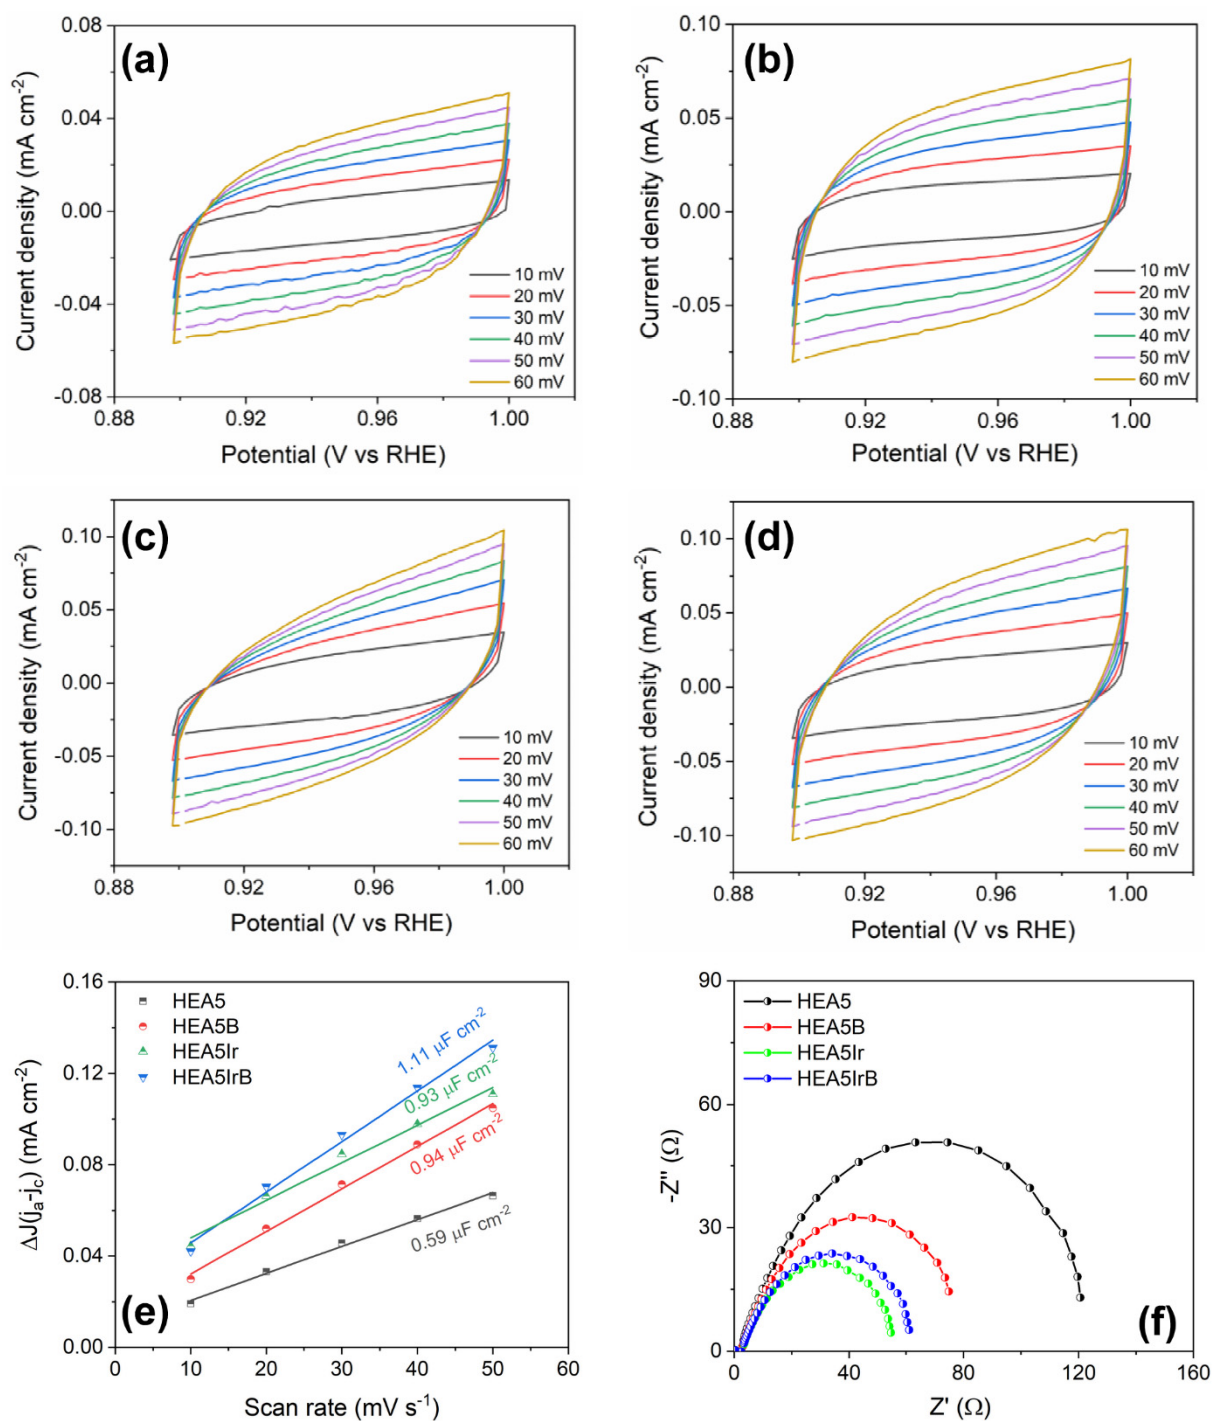

**Figure S6.** CV curves measured at different scan rates from 10 to 60 mV s<sup>-1</sup> in 1.0 M KOH. (a) HEA5, (b) HEA5B, (c) HEA5Ir (d) HEA5IrB (The capacitive current at the middle potential of the CV curves is a function of scan rate). (f) EIS Nyquist plots of HEA5, HEA5B, HEA5Ir, and HEA5IrB.

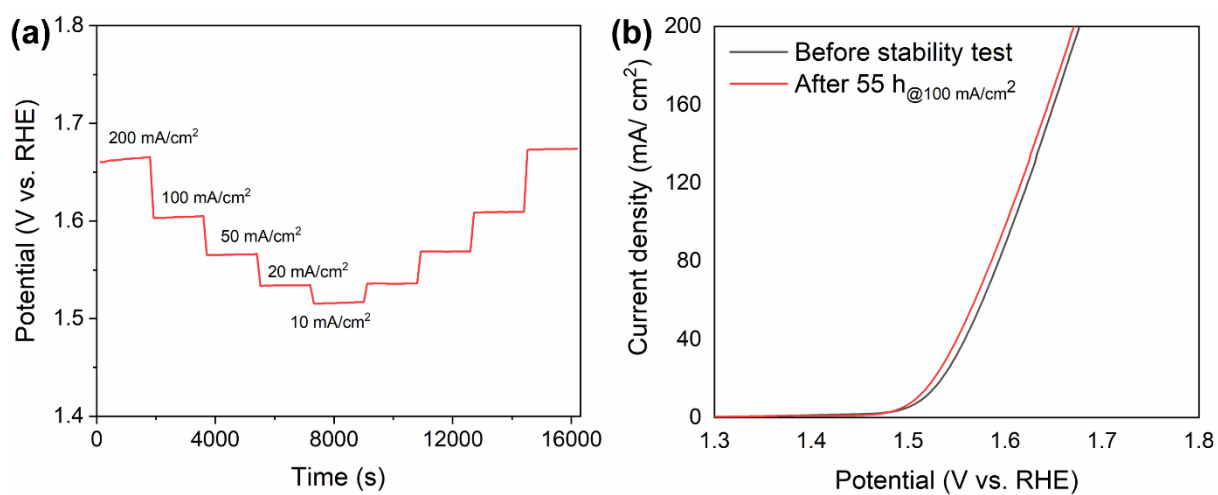

**Figure S7.** Electrochemical stability. (a) Potential at different current densities. (b) OER polarization curves of the spent HEA5IrB sample after the durability test (55 h@100 mA/cm<sup>2</sup>) compared to the as-prepared sample.



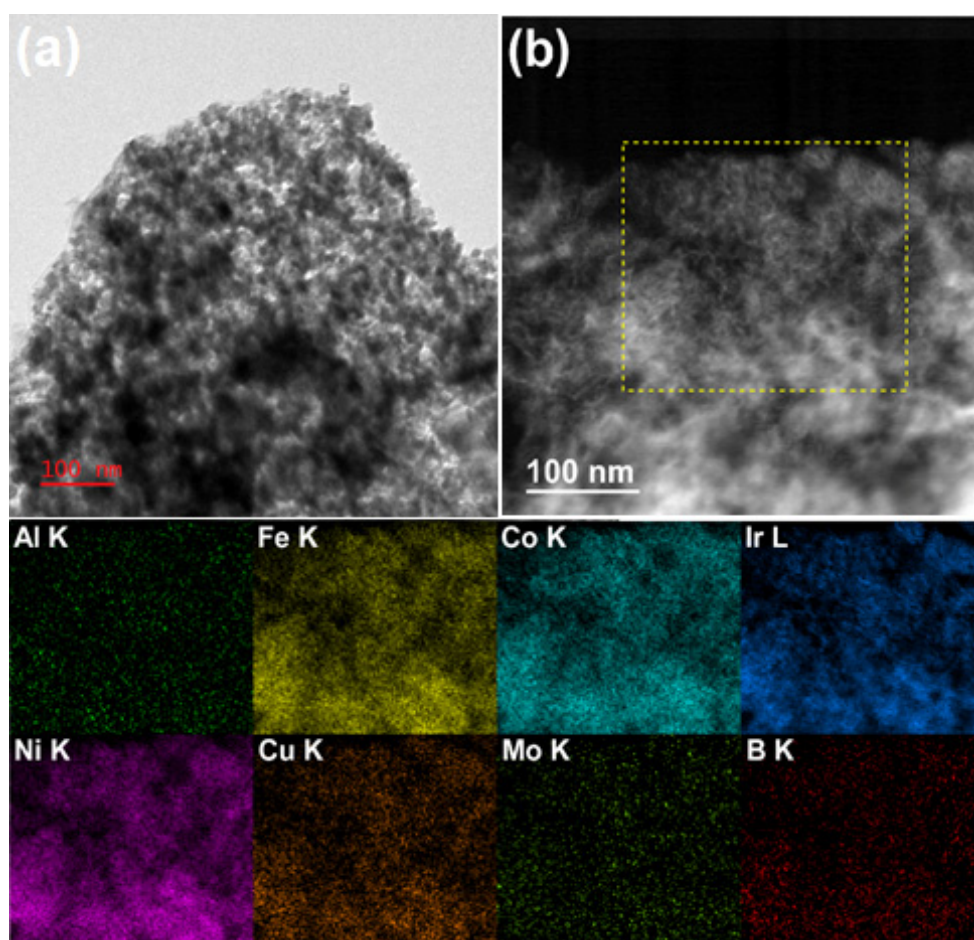

**Figure S8.** TEM images of the spent HEA5IrB. (a) Low-magnification TEM image. (b) High-angle dark-field STEM image of the np-HEAs and corresponding EDS maps of each characteristic peak.

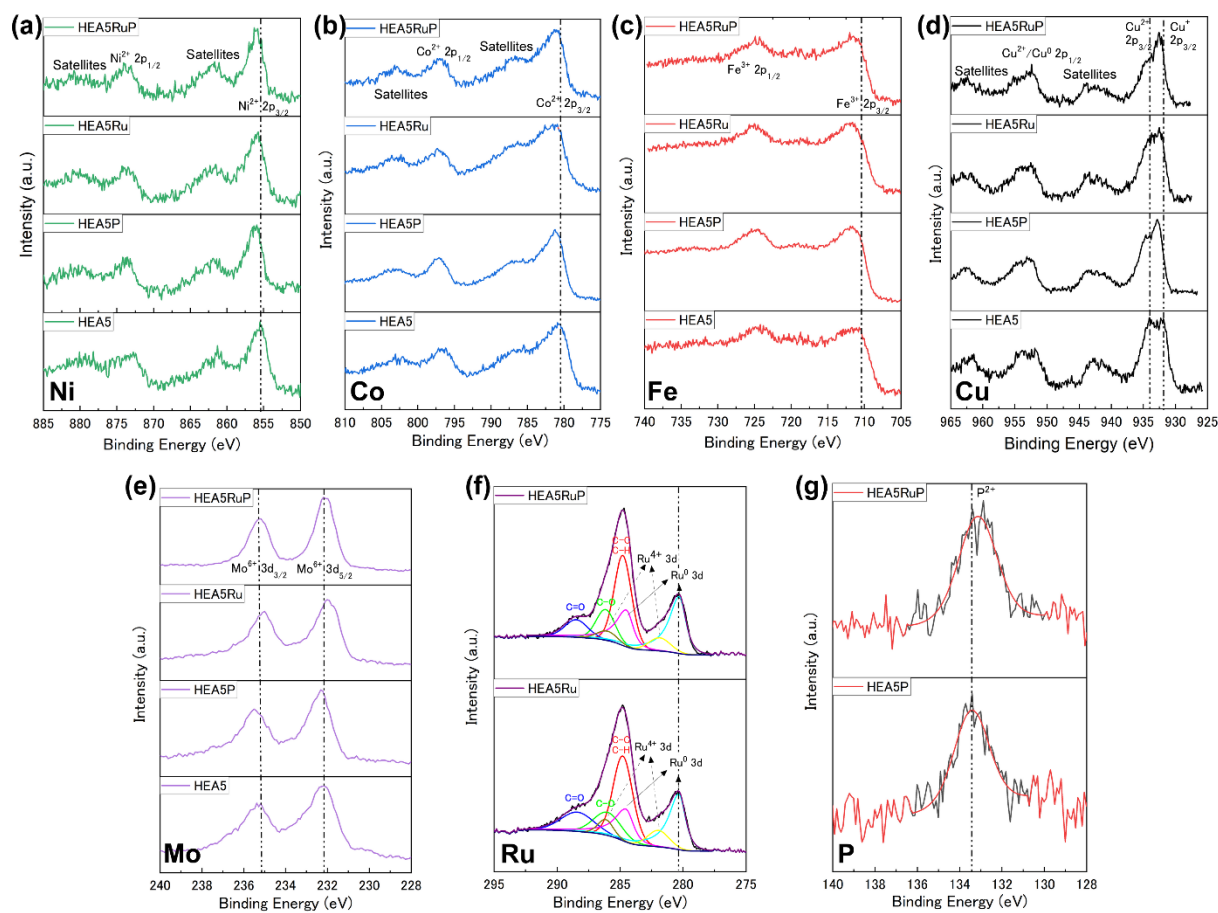

**Figure S9.** XPS spectra of the np-HEA catalysts, HEA5, HEA5P, HEA5Ru, and HEA5RuP.

(a) Ni 2p, (b) Co 2p, (c) Fe 2p, (d) Cu 2p, (e) Mo 3d, (f) Ru 3d, and (g) P 1s.

**Table S1.** ICP analysis of the np-HEAs. The units represent the atomic percentage (at. %).

| <b>Element</b> | <b>HEA5</b> | <b>HEA5B</b> | <b>HEA5P</b> | <b>HEA5Ru</b> | <b>HEA5Ir</b> | <b>HEA5RuP</b> | <b>HEA5IrB</b> |
|----------------|-------------|--------------|--------------|---------------|---------------|----------------|----------------|
| <b>Al</b>      | 14.2        | 13           | 14.9         | 15.2          | 14.7          | 16.7           | 15.7           |
| <b>Fe</b>      | 18          | 19.4         | 15.6         | 17.5          | 14            | 12.0           | 13.8           |
| <b>Co</b>      | 18.6        | 18.4         | 16.2         | 15            | 14.8          | 14.3           | 14.2           |
| <b>Ni</b>      | 18.7        | 18.5         | 17.9         | 14.9          | 14.9          | 14.7           | 14.4           |
| <b>Mo</b>      | 13.3        | 8.6          | 13           | 10.7          | 12.7          | 10.4           | 8.4            |
| <b>Cu</b>      | 17.2        | 18.4         | 16.6         | 14.6          | 14.2          | 14.1           | 13.7           |
| <b>Ru</b>      | -           | -            | -            | 12.2          | -             | 12.9           | -              |
| <b>Ir</b>      | -           | -            | -            | -             | 14.7          | -              | 14.9           |
| <b>P</b>       | -           | -            | 5.9          | -             | -             | 4.9            | -              |
| <b>B</b>       | -           | 3.9          | -            | -             | -             | -              | 4.9            |

**Table S2.** BET surface of the np-HEAs.

|                                              | <b>HEA5</b> | <b>HEA5B</b> | <b>HEA5P</b> | <b>HEA5Ru</b> | <b>HEA5Ir</b> | <b>HEA5RuP</b> | <b>HEA5IrB</b> |
|----------------------------------------------|-------------|--------------|--------------|---------------|---------------|----------------|----------------|
| <b>BET<br/>Surface<br/>(m<sup>2</sup>/g)</b> | 24.2        | 38.9         | 29.5         | 35.7          | 45.5          | 35.3           | 30.9           |
